# Supplementary material for: Ginsenoside CK improves skeletal muscle insulin resistance by activating DRP1/PINK1-mediated mitophagy
Source: Royal Society of Chemistry journal article supplement (doi:10.1039/d2fo02026b), 2022-12-09

### Western blots images

Figure 2A

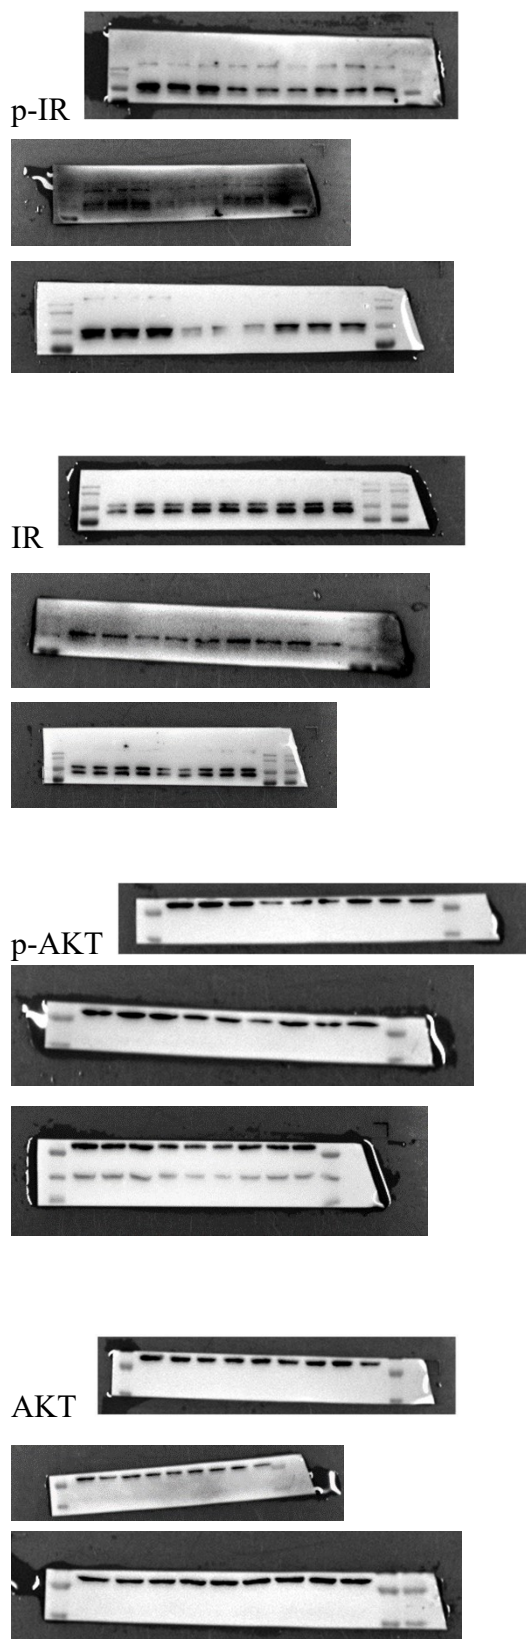

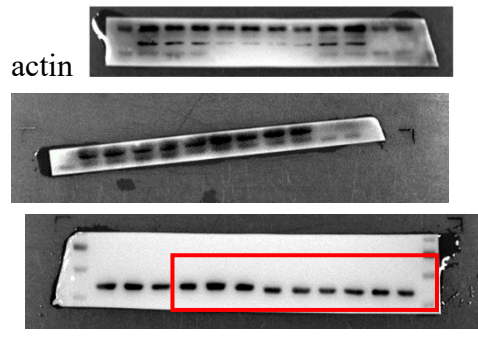

Figure 2C

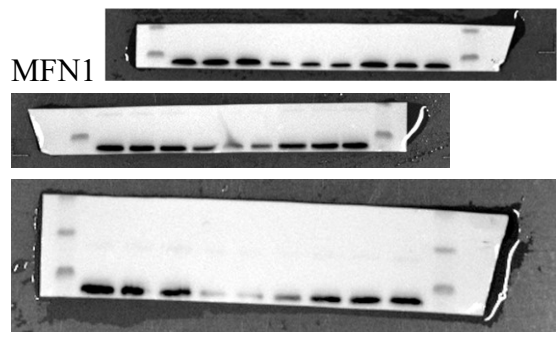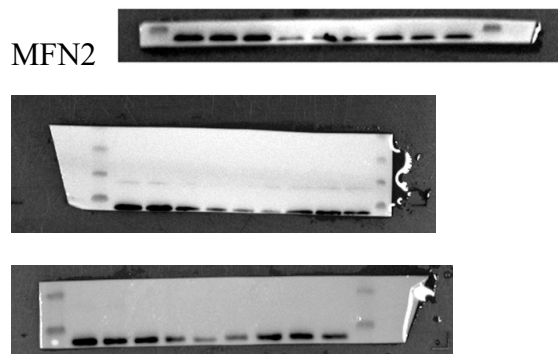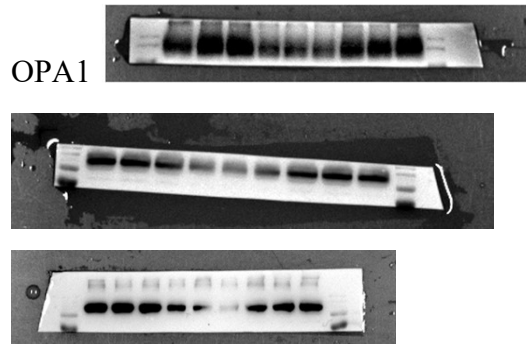

VDAC1

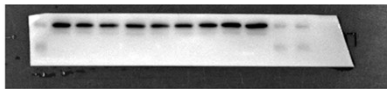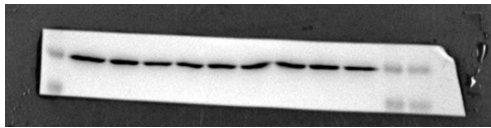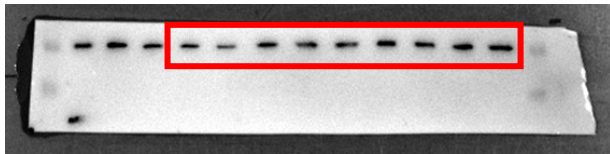

p-DRP1

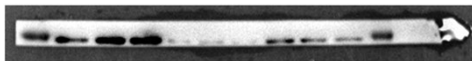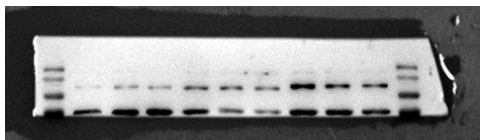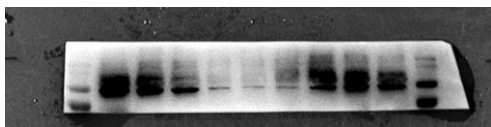

DRP1

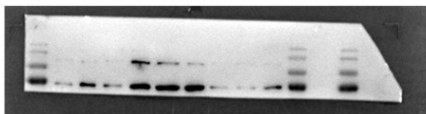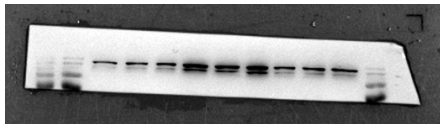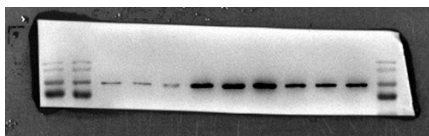

FIS1

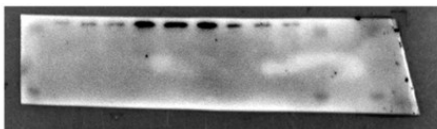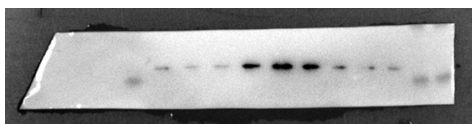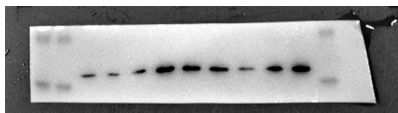

VDAC1

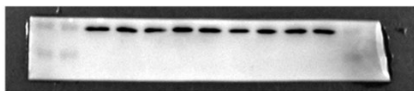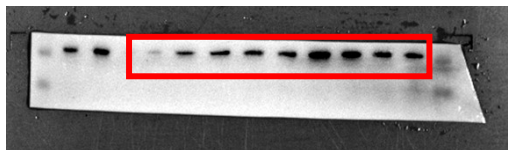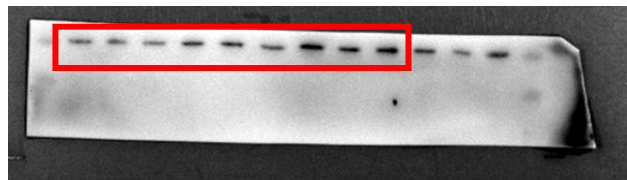

**Figure 2E**

ACOX1

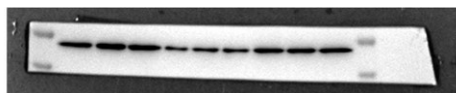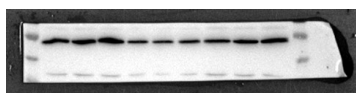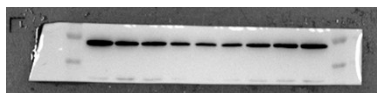

CPT2

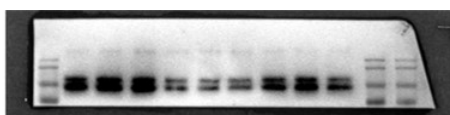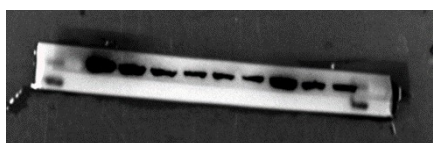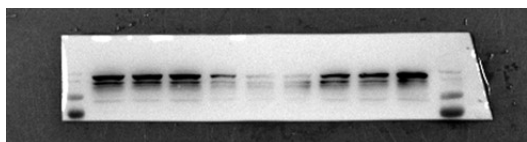

COX6A1

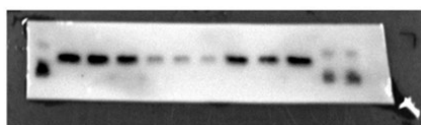

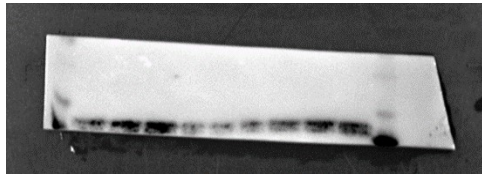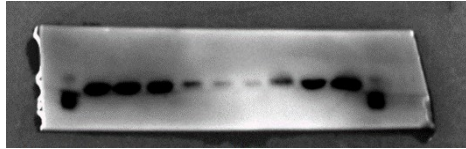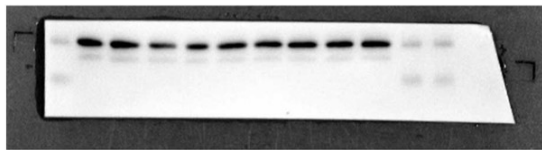

VDAC1

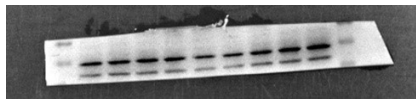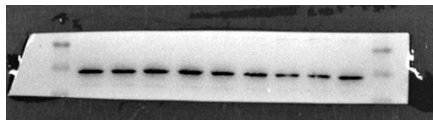

**Figure 3B**

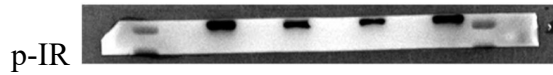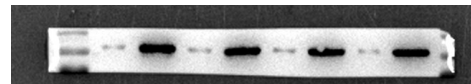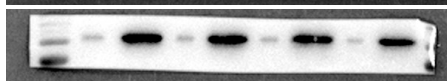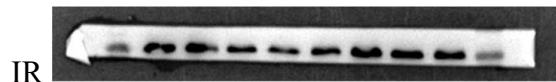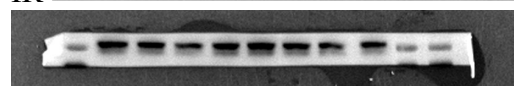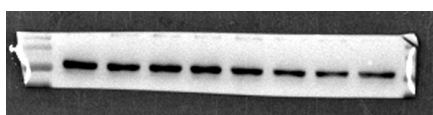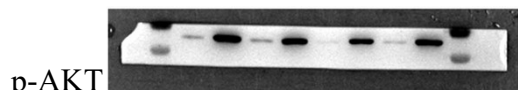

p-AKT

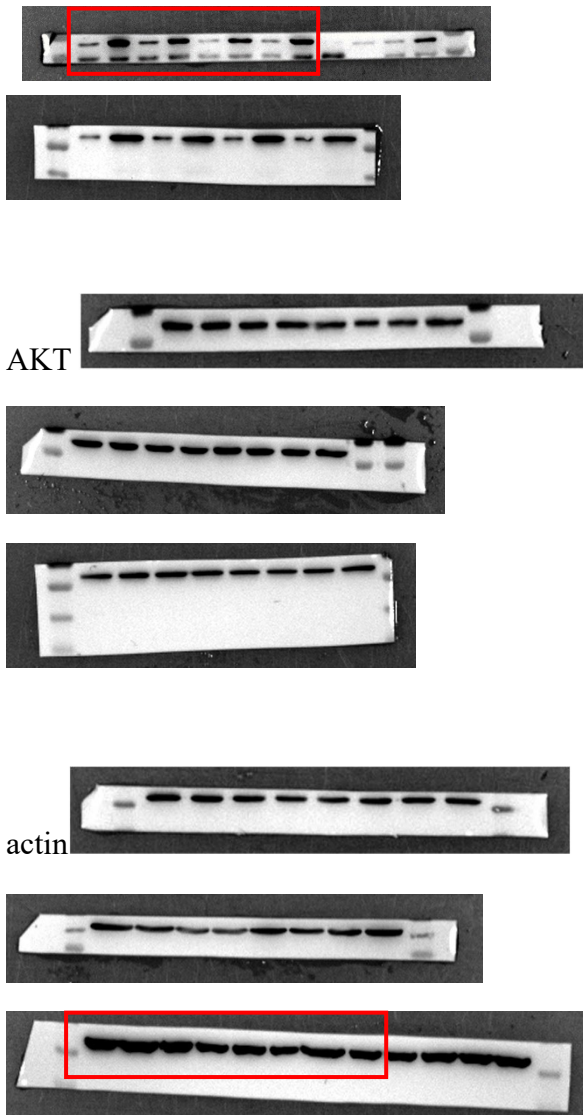

**Figure 3D**

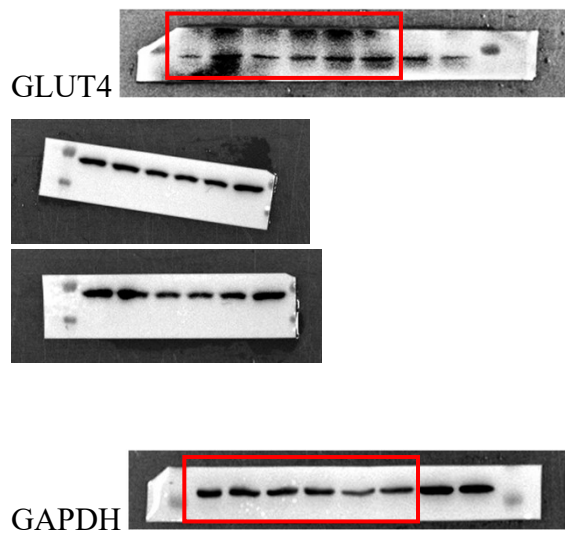

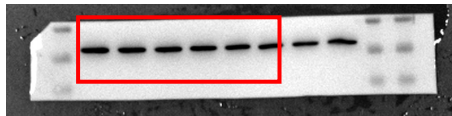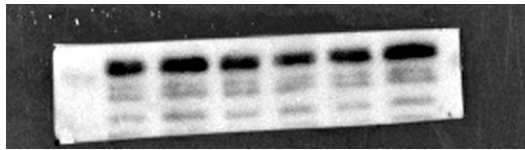

**Figure 4C**

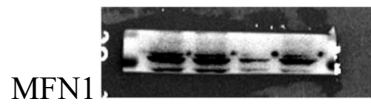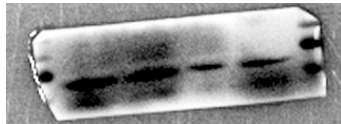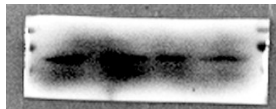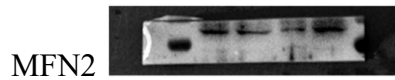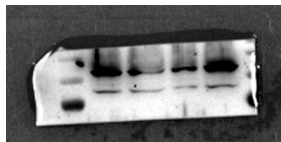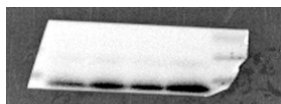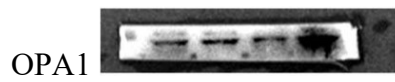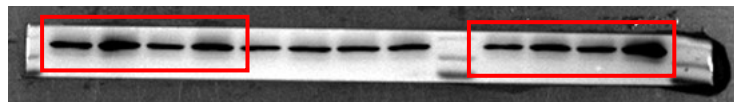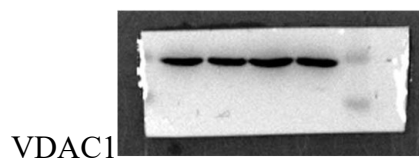

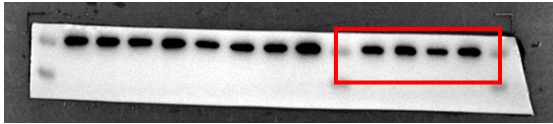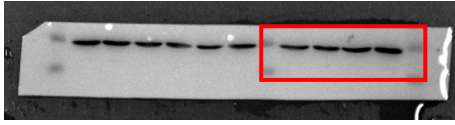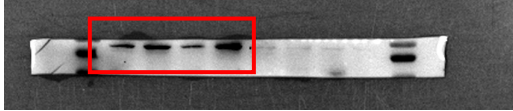

p-DRP1

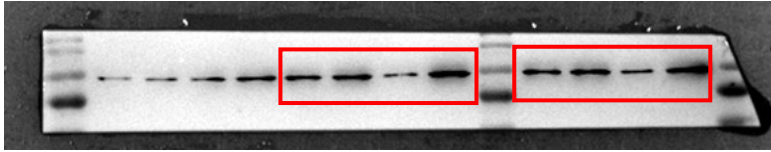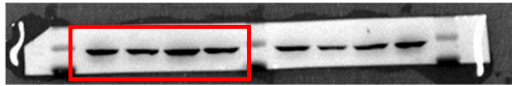

DRP1

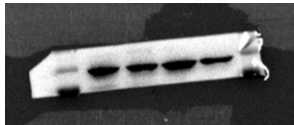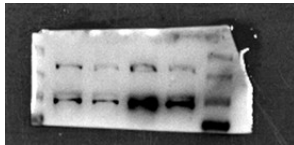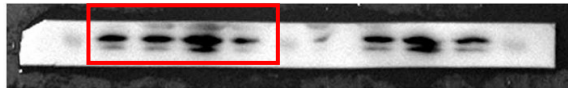

FIS1

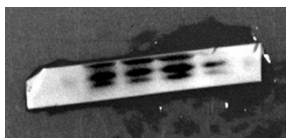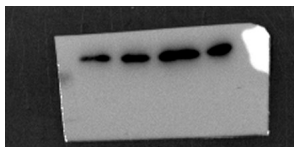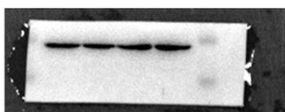

VDAC1



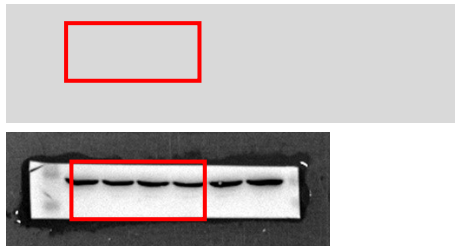

**Figure 4I**

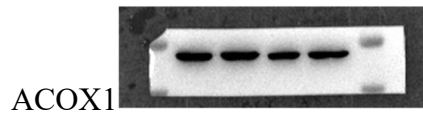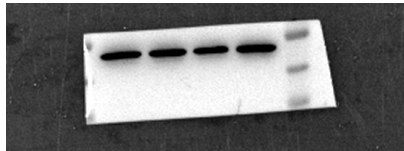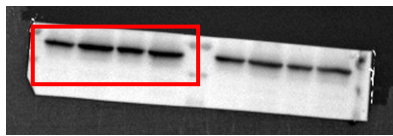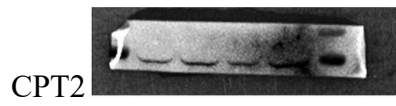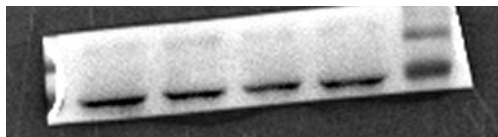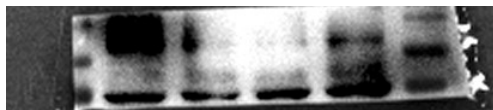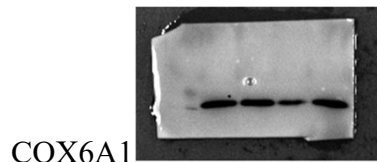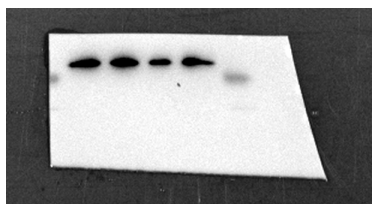

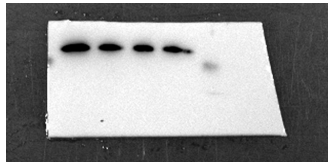

VDAC1

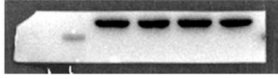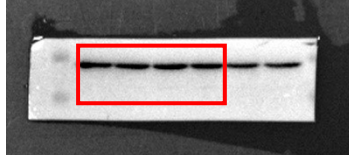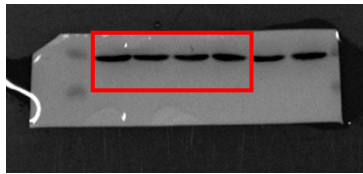

**Figure 5C**

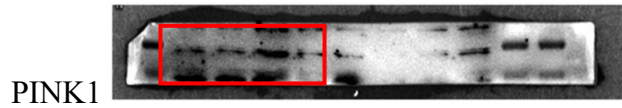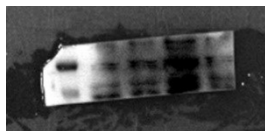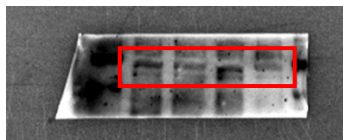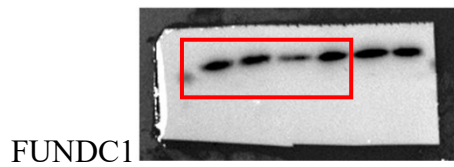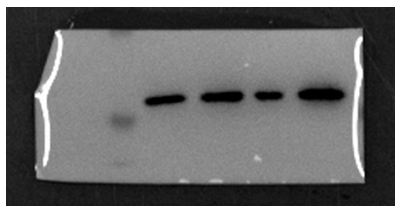

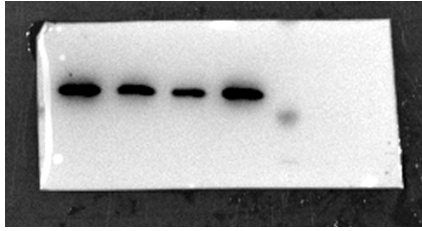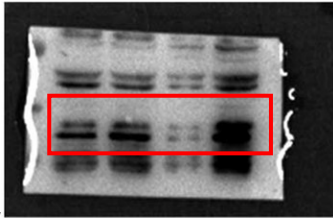

BNIP3L

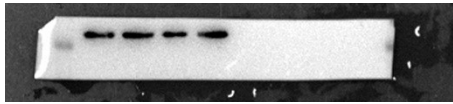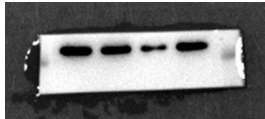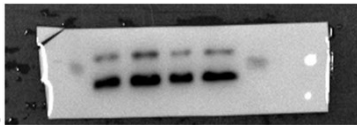

LC3

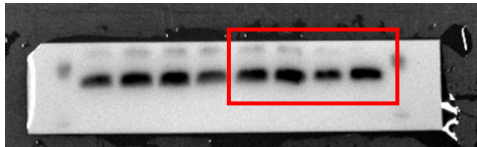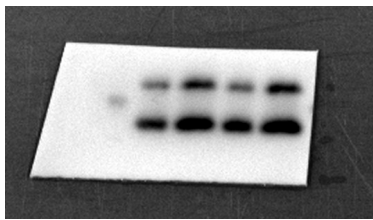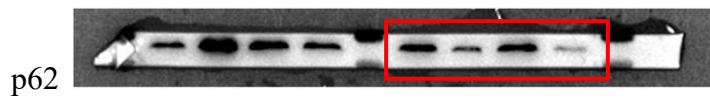

p62

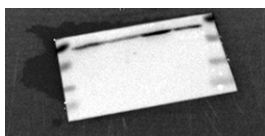

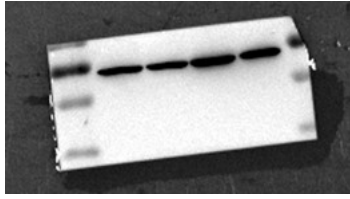

actin

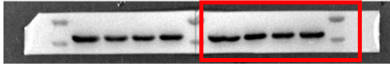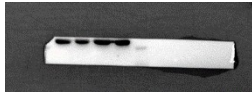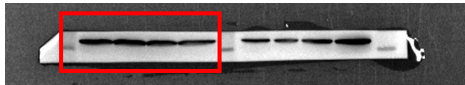

PINK1

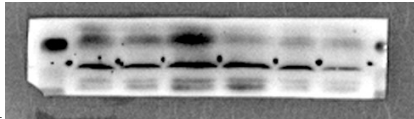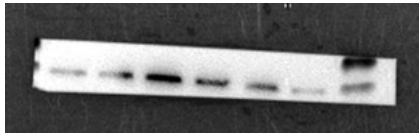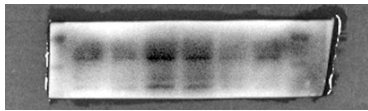

FUNDC1

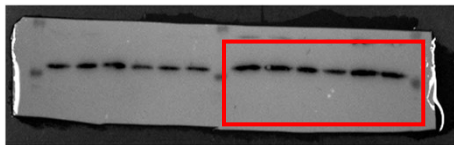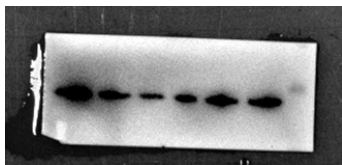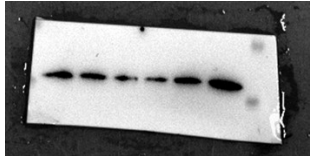

BNIP3L

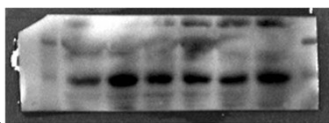

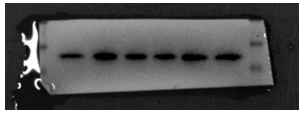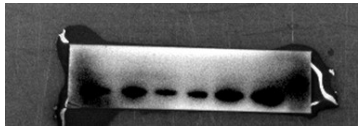

LC3

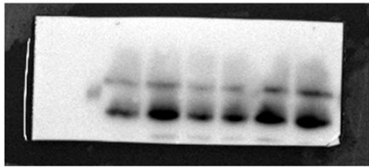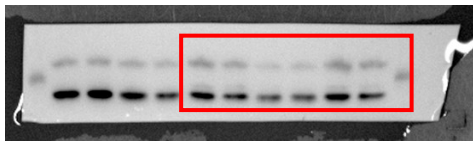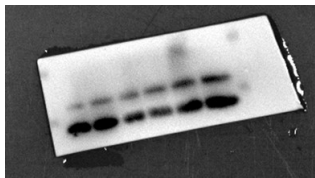

p62

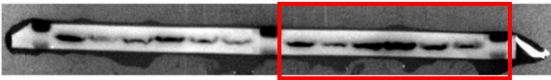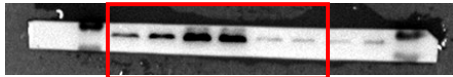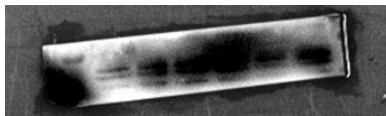

actin

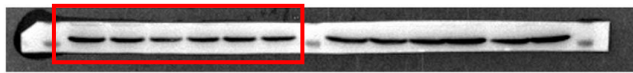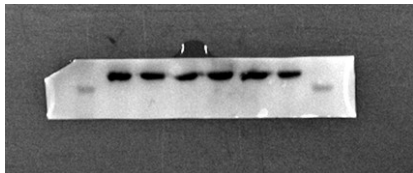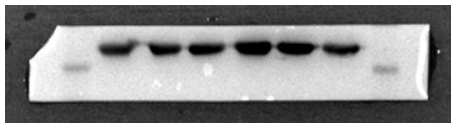

**Figure 5D**

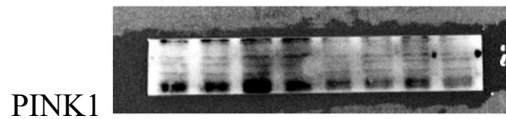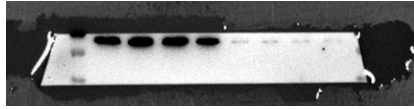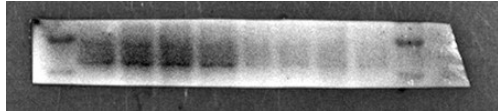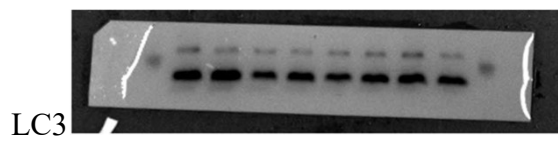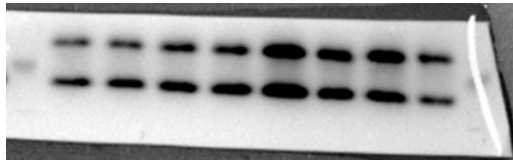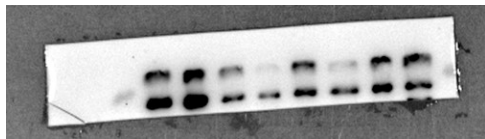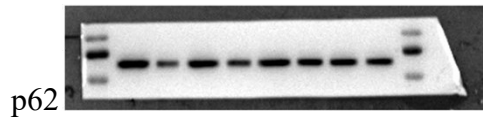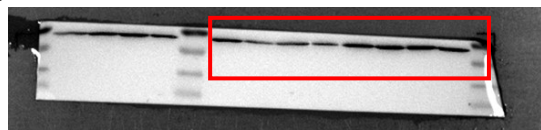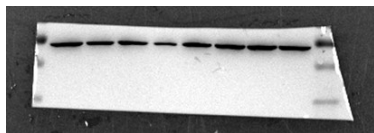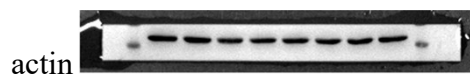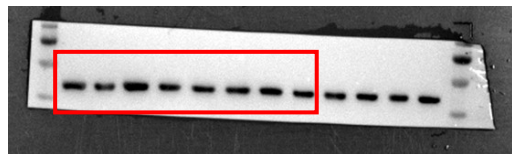

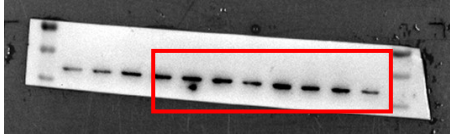

FUNDC1

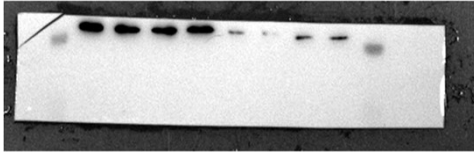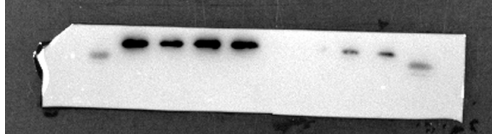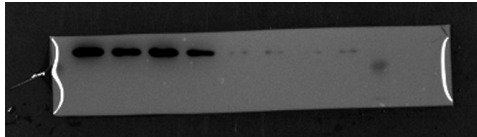

LC3

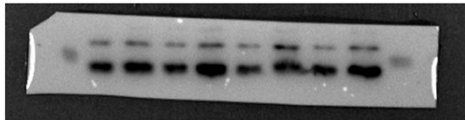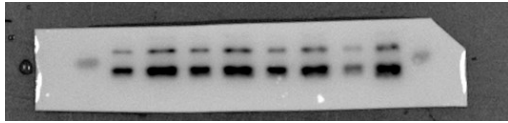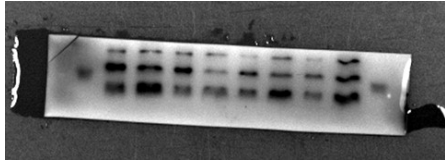

p62

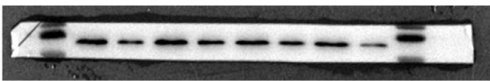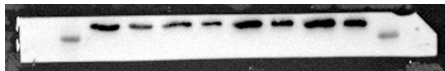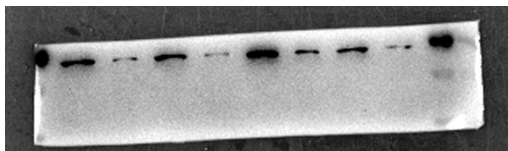

actin

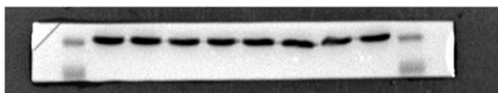

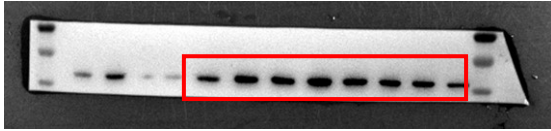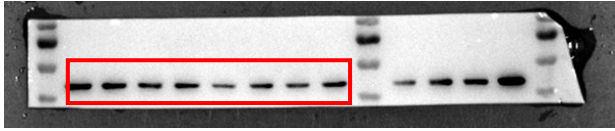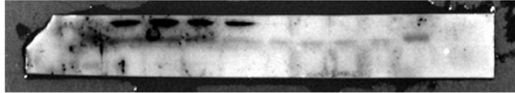

BNIP3L

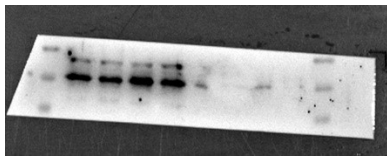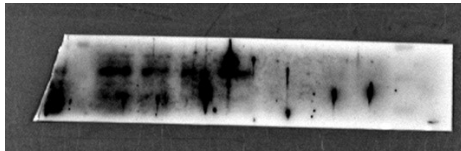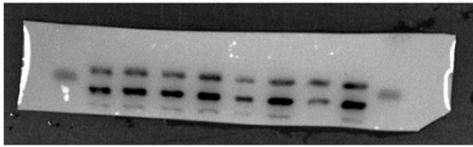

LC3

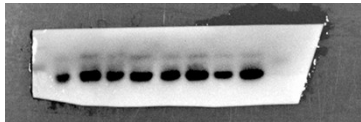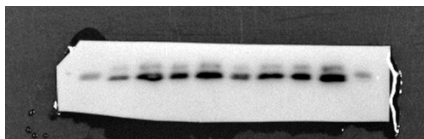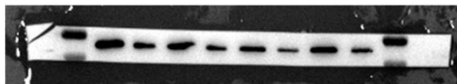

p62

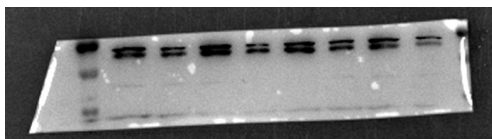



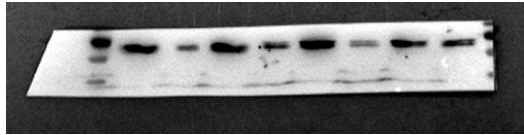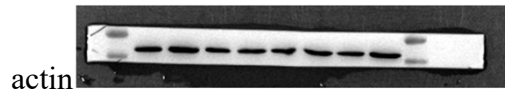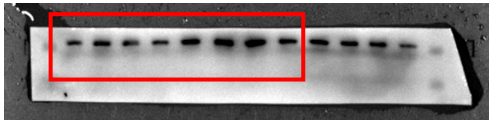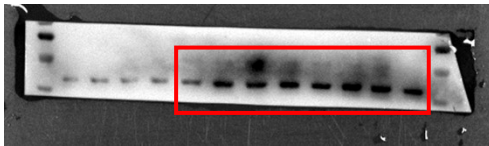

**Figure 5E**

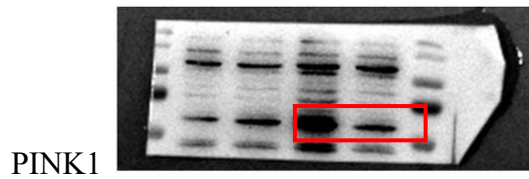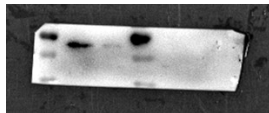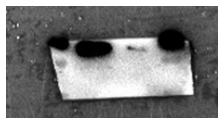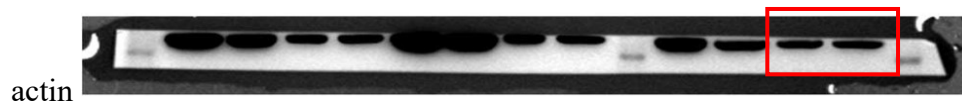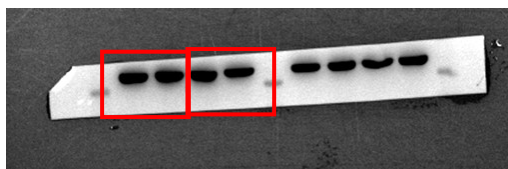

**Figure 5G**

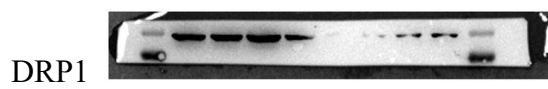

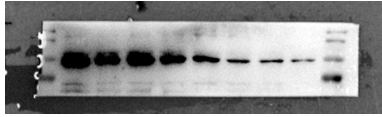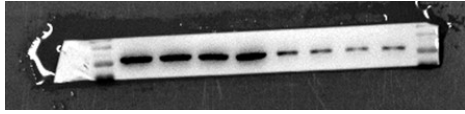

LC3

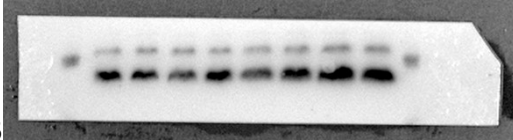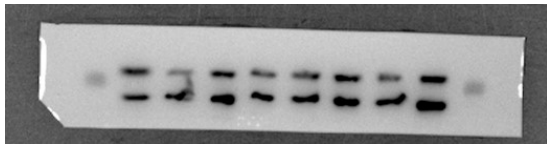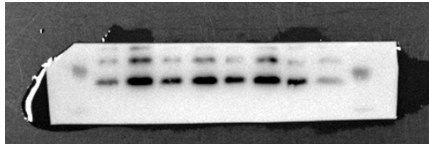

p62

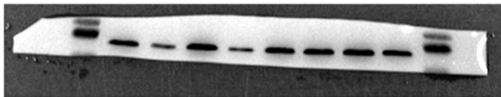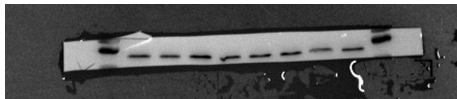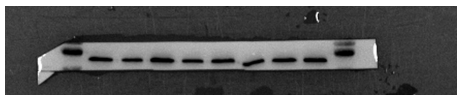

actin

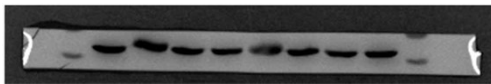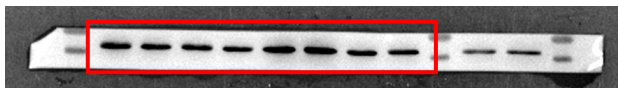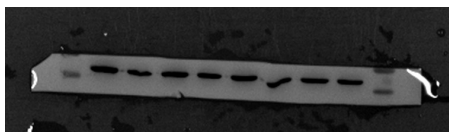

## Supplementary Figure 2

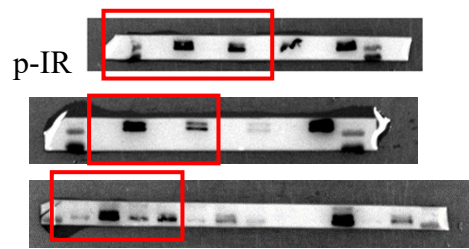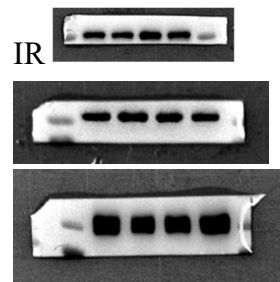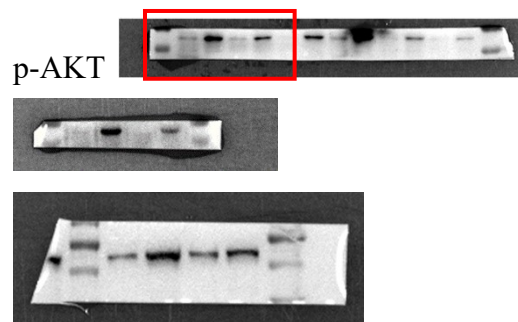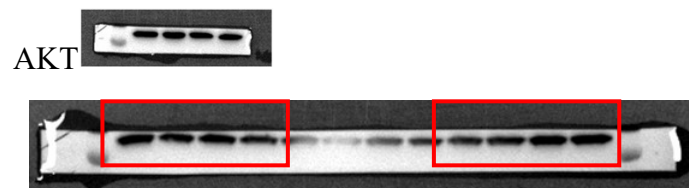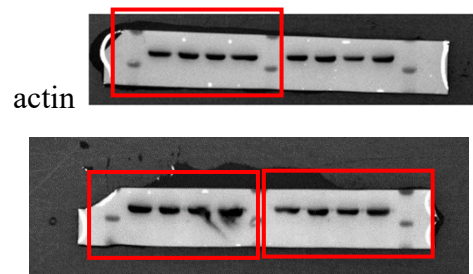

Supplement: d2fo02026b2.pdf [file d2fo02026b2.pdf]
